# Supplementary material for: Solid-state optical properties of self-assembling amyloid-like peptides with different charged states at the terminal ends
Source: PubMed Central journal article supplement (PMC8760239; doi:10.1038/s41598-021-04394-2), 2022-01-14
Supplement: 41598_2021_4394_MOESM1_ESM.pdf [file 41598_2021_4394_MOESM1_ESM.pdf]

## Supplementary Materials

### **Solid-state optical properties of self-assembling amyloid-like peptides with different charged states at the terminal ends**

Chiara Schiattarella,<sup>‡a</sup> Carlo Diaferia<sup>‡b</sup>, Enrico Gallo,<sup>c</sup> Bartolomeo Della Ventura,<sup>d</sup> Giancarlo Morelli,<sup>b</sup> Luigi Vitagliano,<sup>e</sup> Raffaele Velotta<sup>\*d</sup> and Antonella Accardo<sup>\*b</sup>

<sup>a</sup>Institute of Applied Sciences and Intelligent Systems, CNR, Via P. Castellino 111, Naples, 80131, Italy.

<sup>b</sup>Department of Pharmacy and Research Centre on Bioactive Peptides (CIRPeB), University of Naples “Federico II”, Via Mezzocannone 16, Naples, 80134, Italy.

Email: antonella.accardo@unina.it

<sup>c</sup>IRCCS SDN, Via Gianturco 113, Naples, 80143, Italy;

<sup>d</sup>Department of Physics “Ettore Pancini”, University of Naples “Federico II”, Via Cintia 26, Naples, 80125, Italy. Email: rvelotta@unina.it

<sup>e</sup>Institute of Biostructures and Bioimaging (IBB), CNR, Via Mezzocannone 16, 80134, Naples, Italy.

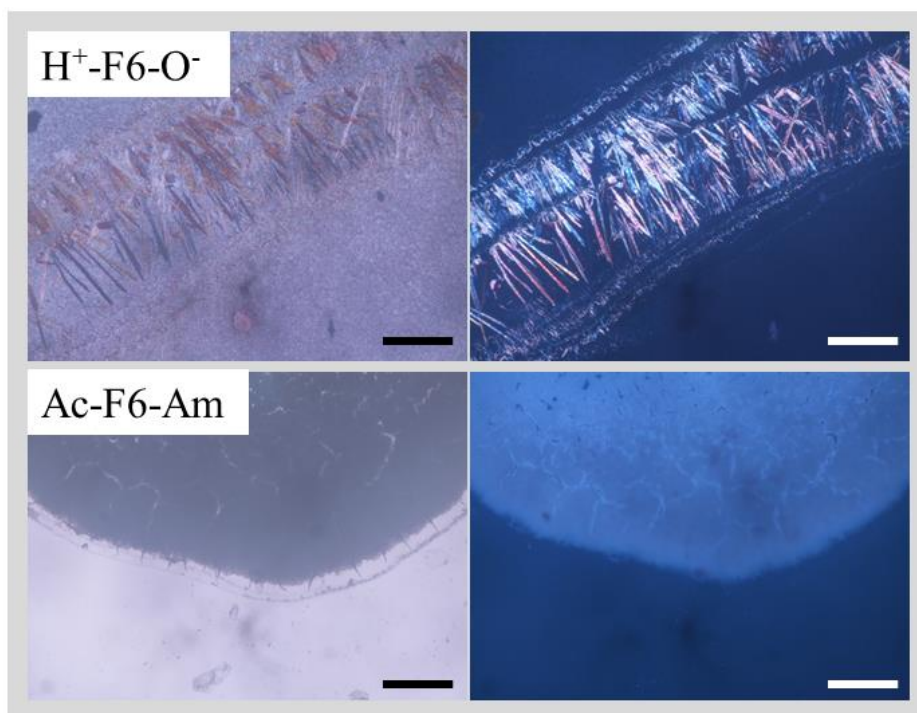

**Figure S1:** Qualitative Safranin T assay for  $H^+-F6-O^-$  and  $Ac-F6-Am$ . Peptide films were imaged under both brightfield (on the left) and polarized light (on the right). Scale bars are 100  $\mu m$ .

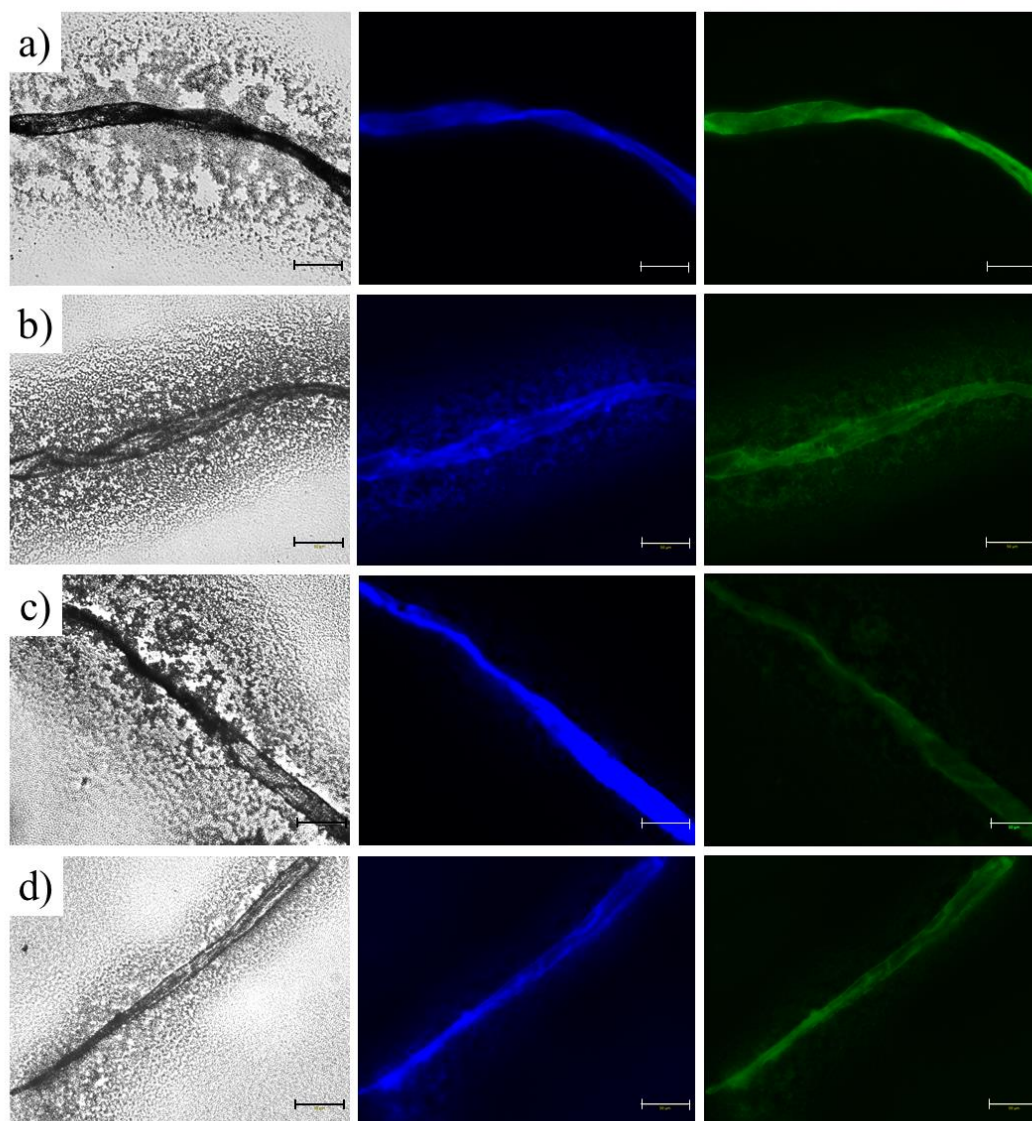

**Figure S2:** Fluorescence microscopy images of: a)  $\text{H}^+\text{-F6-O}^-$ , b)  $\text{Ac-F6-O}^-$ , c)  $\text{H}^+\text{-F6-Amide}$  and d)  $\text{Ac-F6-Amide}$ . All the samples are prepared by deposition of peptide solution ( $5.0 \text{ mg}\cdot\text{mL}^{-1}$ ) in HFIP on a clean coverslip glass and slowly dried at room temperature. On the left, images in the bright field, in the center and on the right PL images in the DAPI (4',6-diamidino-2-phenylindole;  $\lambda_{\text{exc}} = 359 \text{ nm}$ ,  $\lambda_{\text{em}} = 461 \text{ nm}$ ) and GFP (Green Fluorescent protein  $\lambda_{\text{exc}} = 488 \text{ nm}$ ,  $\lambda_{\text{em}} = 507 \text{ nm}$ ) spectral regions. The scale bar =  $50 \mu\text{m}$ .

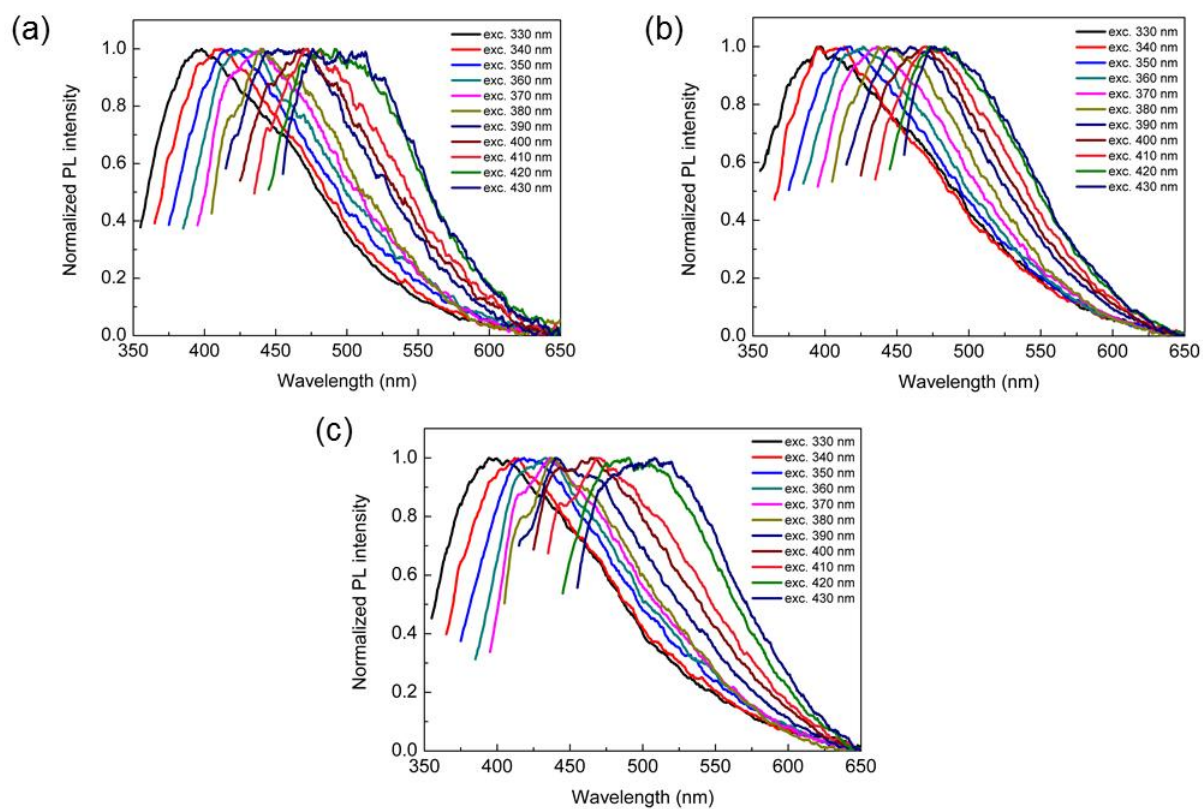

**Figure S3:** Normalized fluorescence spectra of peptide films H<sup>+</sup>-F6-O<sup>-</sup> (a), Ac-F6-O<sup>-</sup> (b) and H<sup>+</sup>-F6-Am (c) versus the excitation wavelength in the range between 330 and 430 nm

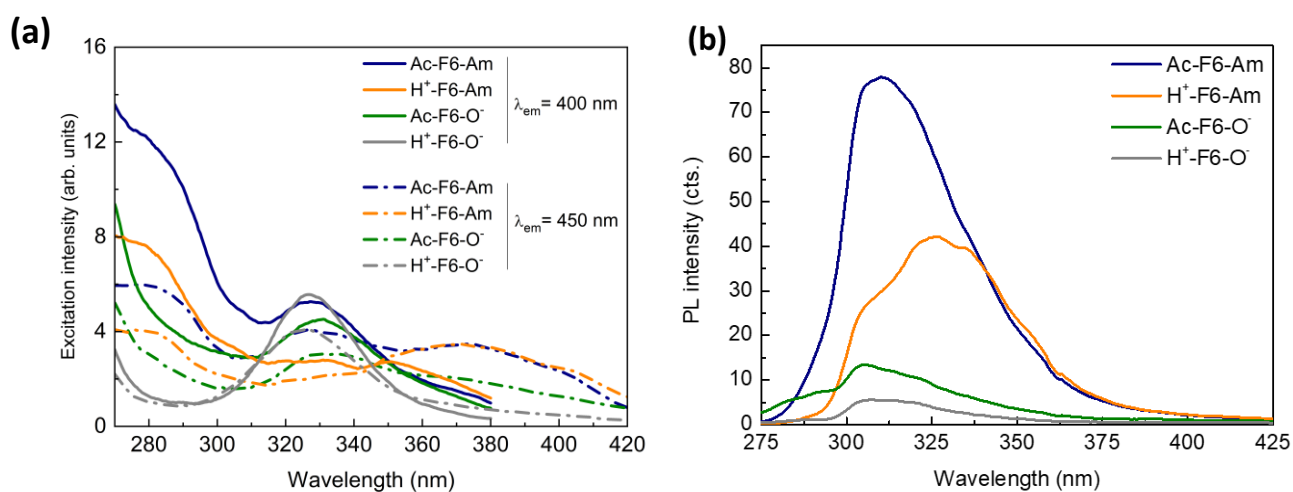

**Figure S4:** (a) Excitation spectra of the F6 setting  $\lambda_{em} = 400$  nm (solid lines) and  $\lambda_{em} = 450$  nm (dash-dotted lines) at 100 mg/mL concentration. (b) Fluorescence spectra of the F6 at  $\lambda_{exc} = 257$  nm.

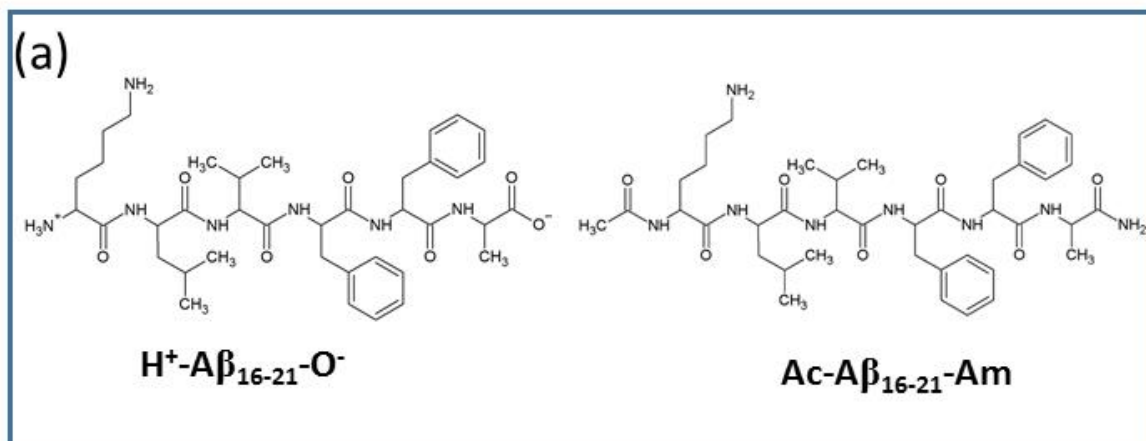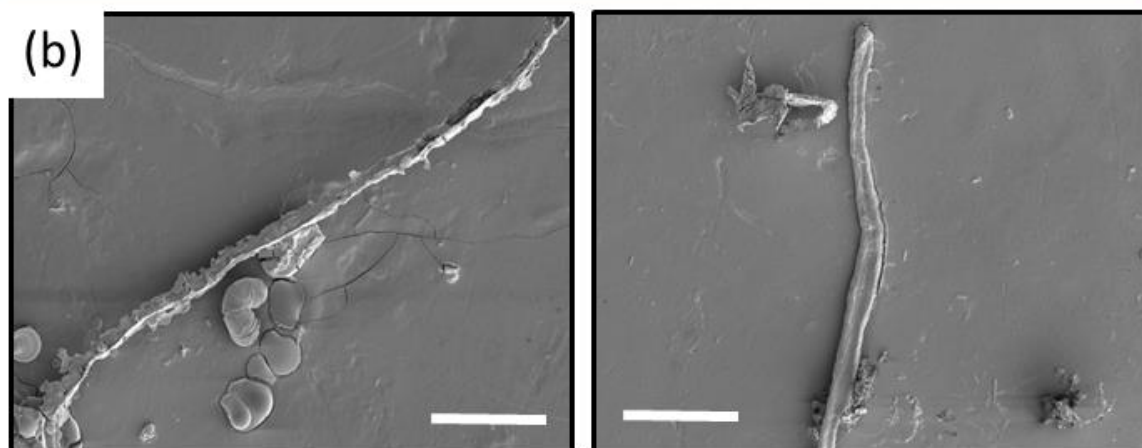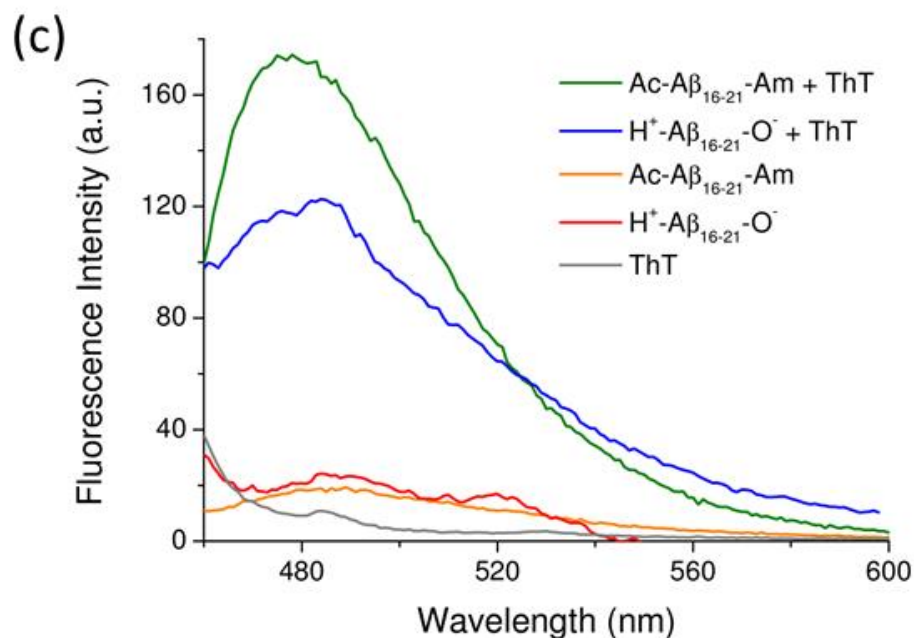

**Figure S5:** a) Schematic representation of the A $\beta$ -peptide variants with charged/uncharged termini. b) Selected micrographs acquired on the A $\beta$ -peptide solution at 5 mg/mL ( $\text{H}^+\text{-A}\beta_{16-21}\text{-O}^-$  on the left and  $\text{Ac-A}\beta_{16-21}\text{-Am}$  on the right) deposited on stub and air-dried (scale bar 100  $\mu\text{m}$ ). c) Fluorescence emission spectra of ThT, A $\beta$ -peptides and the mix of ThT and peptides.
